# Supplementary material for: Congenital Malformations in a Holstein-Fresian Calf with a Unique Mosaic Karyotype: A Case Report
Source: PubMed Central journal article supplement (PMC7552221; doi:10.3390/ani10091615), 2020-09-10
Supplement: animals-10-01615-s001.pdf [file animals-10-01615-s001.pdf]

## Supplementary material

**Table S1.** Analysis of chromosome or chromatid breaks and presence of micronuclei in *in vitro* cultured fibroblasts originated from the affected calf and a healthy control calf.

| Animal        | Metaphase spreads |                                                              | Interphase nuclei           |                          |
|---------------|-------------------|--------------------------------------------------------------|-----------------------------|--------------------------|
|               | Total number      | Number of the spreads with chromatid/chromosome break or gap | Nuclei without micronucleus | Nuclei with micronucleus |
| Affected calf | 100               | 0                                                            | 998                         | 2                        |
| Control calf  | 100               | 0                                                            | 999                         | 1                        |
